# Supplementary material
Source: MDPI journal article supplement (https://www.mdpi.com/2071-1050/11/23/6814)
Supplement: s1 [file s1]

Supplementary materials

Table S1. The time-series of census data used in our analysis for four key sites in the Yangtze River.

| NO. | Lake name     | Area<br>(km <sup>2</sup> ) | Province | 2000/01 | 2001/02 | 2002/03 | 2003/04 | 2004/05 | 2005/06 | 2006/07 | 2007/08 | 2008/09 | 2009/10 | 2010/11 | 2011/12 | 2012/13 | 2013/14 | 2014/15 | 2015/16 |
|-----|---------------|----------------------------|----------|---------|---------|---------|---------|---------|---------|---------|---------|---------|---------|---------|---------|---------|---------|---------|---------|
| 1   | Shengjin Hu   | 132.59                     | Anhui    | ND      | ND      | ND      | 1-Feb   | 2-Feb   | 3-Feb   | 3-Feb   | 7-Feb   | 7-Feb   | 7-Feb   | 7-Feb   | 7-Feb   | 7-Feb   | 7-Jan   | 7-Jan   | 7-Jan   |
| 2   | Baidang Hu    | 38.97                      | Anhui    | ND      | ND      | ND      | 1-Feb   | 2-Feb   | 3-Feb   | 3-Feb   | 7-Feb   | 7-Feb   | 7-Feb   | 7-Feb   | 7-Dec   | 7-Feb   | 7-Jan   | 7-Jan   | 7-Jan   |
| 3   | Caizi Hu      | 196.52                     | Anhui    | ND      | ND      | ND      | 1-Feb   | 2-Feb   | 3-Feb   | 3-Feb   | 7-Feb   | 7-Feb   | 7-Feb   | 7-Feb   | 7-Dec   | 7-Feb   | 7-Jan   | 7-Jan   | 7-Jan   |
| 4   | Huangda Hu    | 270.55                     | Anhui    | ND      | ND      | ND      | 1-Feb   | 2-Feb   | 3-Feb   | 3-Feb   | 7-Feb   | 7-Feb   | 7-Feb   | 7-Feb   | 7-Dec   | 7-Feb   | 7-Jan   | 7-Jan   | 7-Jan   |
| 5   | Po Hu         | 151.29                     | Anhui    | ND      | ND      | ND      | 1-Feb   | 2-Feb   | 3-Feb   | 3-Feb   | 7-Feb   | 7-Feb   | 7-Feb   | 7-Feb   | 7-Dec   | 7-Feb   | 7-Jan   | 7-Jan   | 7-Jan   |
| 6   | Fengsha Hu    | 16.62                      | Anhui    | ND      | ND      | ND      | 1-Feb   | 2-Feb   | 3-Feb   | 3-Feb   | 7-Feb   | 7-Feb   | 7-Feb   | 7-Feb   | 7-Dec   | 7-Feb   | 7-Jan   | 7-Jan   | 7-Jan   |
| 7   | Wuchang Hu    | 103.38                     | Anhui    | ND      | ND      | ND      | 1-Feb   | 2-Feb   | 3-Feb   | 3-Feb   | 7-Feb   | 7-Feb   | 7-Feb   | 7-Feb   | 7-Dec   | 7-Feb   | 7-Jan   | 7-Jan   | 7-Jan   |
| 8   | Caisang Hu    | 148.32                     | Hunan    | ND      | ND      | ND      | 1-Feb   | 2-Feb   | 6-Jan   | 6-Jan   | 6-Feb   | 7-Feb   | 7-Feb   | 7-Feb   | 6-Jan   | 6-Jan   | 6-Jan   | 6-Jan   | 7-Jan   |
| 9   | Dingzidi      | 90.45                      | Hunan    | ND      | ND      | ND      | 1-Feb   | 2-Feb   | 6-Jan   | 6-Jan   | 6-Feb   | 7-Feb   | 7-Feb   | 7-Feb   | 6-Jan   | 6-Jan   | 6-Jan   | 6-Jan   | 7-Jan   |
| 10  | Bai-Hongqi Hu | 323.18                     | Hunan    | ND      | ND      | ND      | 1-Feb   | 2-Feb   | 6-Jan   | 6-Jan   | 6-Feb   | 7-Feb   | 7-Feb   | 7-Feb   | 6-Jan   | 6-Jan   | 6-Jan   | 6-Jan   | 7-Jan   |
| 11  | Chunfeng Hu   | 82.24                      | Hunan    | ND      | ND      | ND      | 1-Feb   | 2-Feb   | 6-Jan   | 6-Jan   | 6-Feb   | 7-Feb   | 7-Feb   | 7-Feb   | 6-Jan   | 6-Jan   | 6-Jan   | 6-Jan   | 7-Jan   |
| 12  | Beigang Hu    | 25.36                      | Jiangxi  | 5-Jan   | 5-Jan   | 5-Jan   | 1-Feb   | 2-Feb   | 5-Dec   | 5-Dec   | 5-Jan   | 5-Feb   | 5-Feb   | 5-Feb   | 5-Feb   | ND      | ND      | 7-Feb   | 7-Feb   |
| 13  | Liaohua Chi   | 6.13                       | Jiangxi  | 5-Jan   | 5-Jan   | 5-Jan   | 1-Feb   | 2-Feb   | 5-Dec   | 5-Dec   | 5-Jan   | 5-Feb   | 5-Feb   | 5-Feb   | 5-Feb   | ND      | ND      | 7-Feb   | 7-Feb   |
| 14  | Sai Hu        | 60.50                      | Jiangxi  | 5-Jan   | 5-Jan   | 5-Jan   | 1-Feb   | 2-Feb   | 5-Dec   | 5-Dec   | 5-Jan   | 5-Feb   | 5-Feb   | 5-Feb   | 5-Feb   | ND      | ND      | 7-Feb   | 7-Feb   |
| 15  | Shili Hu      | 12.27                      | Jiangxi  | 5-Jan   | 5-Jan   | 5-Jan   | 1-Feb   | 2-Feb   | 5-Dec   | 5-Dec   | 5-Jan   | 5-Feb   | 5-Feb   | 5-Feb   | 5-Feb   | ND      | ND      | 7-Feb   | 7-Feb   |
| 16  | Zao Hu        | 12.26                      | Jiangxi  | 5-Jan   | 5-Jan   | 5-Jan   | 1-Feb   | 2-Feb   | 5-Dec   | 5-Dec   | 5-Jan   | 5-Feb   | 5-Feb   | 5-Feb   | 5-Feb   | ND      | ND      | 7-Feb   | 7-Feb   |
| 17  | Nan Hu        | 6.77                       | Jiangxi  | 5-Jan   | 5-Jan   | 5-Jan   | 1-Feb   | 2-Feb   | 5-Dec   | 5-Dec   | 5-Jan   | 5-Feb   | 5-Feb   | 5-Feb   | 5-Feb   | ND      | ND      | 7-Feb   | 7-Feb   |
| 18  | Zhu Hu        | 73.68                      | Jiangxi  | 5-Jan   | 5-Jan   | 5-Jan   | 1-Feb   | 2-Feb   | 5-Dec   | 5-Dec   | 5-Jan   | 5-Feb   | 5-Feb   | 5-Feb   | 5-Feb   | ND      | ND      | 7-Feb   | 7-Feb   |
| 19  | Junshan Hu    | 155.56                     | Jiangxi  | 5-Jan   | 5-Jan   | 5-Jan   | 1-Feb   | 2-Feb   | 5-Dec   | 5-Dec   | 5-Jan   | 5-Feb   | 5-Feb   | 5-Feb   | 5-Feb   | ND      | ND      | 7-Feb   | 7-Feb   |
| 20  | Fang Hu       | 29.72                      | Jiangxi  | 5-Jan   | 5-Jan   | 5-Jan   | 1-Feb   | 2-Feb   | 5-Dec   | 5-Dec   | 5-Jan   | 5-Feb   | 5-Feb   | 5-Feb   | 5-Feb   | ND      | ND      | 7-Feb   | 7-Feb   |
| 21  | Taibo Hu      | 35.53                      | Jiangxi  | 5-Jan   | 5-Jan   | 5-Jan   | 1-Feb   | 2-Feb   | 5-Dec   | 5-Dec   | 5-Jan   | 5-Feb   | 5-Feb   | 5-Feb   | 5-Feb   | ND      | ND      | 7-Feb   | 7-Feb   |
| 22  | Chi Hu        | 71.38                      | Jiangxi  | 5-Jan   | 5-Jan   | 5-Jan   | 1-Feb   | 2-Feb   | 5-Dec   | 5-Dec   | 5-Jan   | 5-Feb   | 5-Feb   | 5-Feb   | 5-Feb   | ND      | ND      | 7-Feb   | 7-Feb   |
| 23  | Wan Hu        | 7.53                       | Jiangxi  | 5-Jan   | 5-Jan   | 5-Jan   | 1-Feb   | 2-Feb   | 5-Dec   | 5-Dec   | 5-Jan   | 5-Feb   | 5-Feb   | 5-Feb   | 5-Feb   | ND      | ND      | 7-Feb   | 7-Feb   |
| 24  | Qili Hu       | 15.88                      | Jiangxi  | 5-Jan   | 5-Jan   | 5-Jan   | 1-Feb   | 2-Feb   | 5-Dec   | 5-Dec   | 5-Jan   | 5-Feb   | 5-Feb   | 5-Feb   | 5-Feb   | ND      | ND      | 7-Feb   | 7-Feb   |
| 25  | Xieshan Hu    | 11.36                      | Jiangxi  | 5-Jan   | 5-Jan   | 5-Jan   | 1-Feb   | 2-Feb   | 5-Dec   | 5-Dec   | 5-Jan   | 5-Feb   | 5-Feb   | 5-Feb   | 5-Feb   | ND      | ND      | 7-Feb   | 7-Feb   |
| 26  | Meixi Hu      | 4.28                       | Jiangxi  | 5-Jan   | 5-Jan   | 5-Jan   | 1-Feb   | 2-Feb   | 5-Dec   | 5-Dec   | 5-Jan   | 5-Feb   | 5-Feb   | 5-Feb   | 5-Feb   | ND      | ND      | 7-Feb   | 7-Feb   |

| NO. | Lake name        | Area<br>(km <sup>2</sup> ) | Province | 2000/01 | 2001/02 | 2002/03 | 2003/04 | 2004/05 | 2005/06 | 2006/07 | 2007/08 | 2008/09 | 2009/10 | 2010/11 | 2011/12 | 2012/13 | 2013/14 | 2014/15 | 2015/16 |
|-----|------------------|----------------------------|----------|---------|---------|---------|---------|---------|---------|---------|---------|---------|---------|---------|---------|---------|---------|---------|---------|
| 27  | Qi Hu            | 12.75                      | Jiangxi  | 5-Jan   | 5-Jan   | 5-Jan   | 1-Feb   | 2-Feb   | 5-Dec   | 5-Dec   | 5-Jan   | 5-Feb   | 5-Feb   | 5-Feb   | 5-Feb   | ND      | ND      | 7-Feb   | 7-Feb   |
| 28  | Gaoqiao Hu       | 7.97                       | Jiangxi  | 5-Jan   | 5-Jan   | 5-Jan   | 1-Feb   | 2-Feb   | 5-Dec   | 5-Dec   | 5-Jan   | 5-Feb   | 5-Feb   | 5-Feb   | 5-Feb   | ND      | ND      | 7-Feb   | 7-Feb   |
| 29  | Gushan Hu        | 3.15                       | Jiangxi  | 5-Jan   | 5-Jan   | 5-Jan   | 1-Feb   | 2-Feb   | 5-Dec   | 5-Dec   | 5-Jan   | 5-Feb   | 5-Feb   | 5-Feb   | 5-Feb   | ND      | ND      | 7-Feb   | 7-Feb   |
| 30  | Boyang Hu        | 5.93                       | Jiangxi  | 5-Jan   | 5-Jan   | 5-Jan   | 1-Feb   | 2-Feb   | 5-Dec   | 5-Dec   | 5-Jan   | 5-Feb   | 5-Feb   | 5-Feb   | 5-Feb   | ND      | ND      | 7-Feb   | 7-Feb   |
| 31  | Jinxi-Chenjia Hu | 104.94                     | Jiangxi  | 5-Jan   | 5-Jan   | 5-Jan   | 1-Feb   | 2-Feb   | 5-Dec   | 5-Dec   | 5-Jan   | 5-Feb   | 5-Feb   | 5-Feb   | 5-Feb   | ND      | ND      | 7-Feb   | 7-Feb   |
| 32  | Dalianzi Hu      | 25.87                      | Jiangxi  | 5-Jan   | 5-Jan   | 5-Jan   | 1-Feb   | 2-Feb   | 5-Dec   | 5-Dec   | 5-Jan   | 5-Feb   | 5-Feb   | 5-Feb   | 5-Feb   | ND      | ND      | 7-Feb   | 7-Feb   |
| 33  | Dong Hu          | 49.61                      | Jiangxi  | 5-Jan   | 5-Jan   | 5-Jan   | 1-Feb   | 2-Feb   | 5-Dec   | 5-Dec   | 5-Jan   | 5-Feb   | 5-Feb   | 5-Feb   | 5-Feb   | ND      | ND      | 7-Feb   | 7-Feb   |
| 34  | Hanchi Hu        | 67.35                      | Jiangxi  | 5-Jan   | 5-Jan   | 5-Jan   | 1-Feb   | 2-Feb   | 5-Dec   | 5-Dec   | 5-Jan   | 5-Feb   | 5-Feb   | 5-Feb   | 5-Feb   | ND      | ND      | 7-Feb   | 7-Feb   |
| 35  | Chang Hu         | 6.80                       | Jiangxi  | 5-Jan   | 5-Jan   | 5-Jan   | 1-Feb   | 2-Feb   | 5-Dec   | 5-Dec   | 5-Jan   | 5-Feb   | 5-Feb   | 5-Feb   | 5-Feb   | ND      | ND      | 7-Feb   | 7-Feb   |
| 36  | Dawu Hu          | 10.53                      | Jiangxi  | 5-Jan   | 5-Jan   | 5-Jan   | 1-Feb   | 2-Feb   | 5-Dec   | 5-Dec   | 5-Jan   | 5-Feb   | 5-Feb   | 5-Feb   | 5-Feb   | ND      | ND      | 7-Feb   | 7-Feb   |
| 37  | San Hu           | 13.87                      | Jiangxi  | 5-Jan   | 5-Jan   | 5-Jan   | 1-Feb   | 2-Feb   | 5-Dec   | 5-Dec   | 5-Jan   | 5-Feb   | 5-Feb   | 5-Feb   | 5-Feb   | ND      | ND      | 7-Feb   | 7-Feb   |
| 38  | Poyanghu NNR     | 230.76                     | Jiangxi  | 5-Jan   | 5-Jan   | 5-Jan   | 1-Feb   | 2-Feb   | 5-Dec   | 5-Dec   | 5-Jan   | 5-Feb   | 5-Feb   | 5-Feb   | 5-Feb   | ND      | ND      | 7-Feb   | 7-Feb   |
| 39  | Jishan Hu        | 11.96                      | Jiangxi  | 5-Jan   | 5-Jan   | 5-Jan   | 1-Feb   | 2-Feb   | 5-Dec   | 5-Dec   | 5-Jan   | 5-Feb   | 5-Feb   | 5-Feb   | 5-Feb   | ND      | ND      | 7-Feb   | 7-Feb   |
| 40  | Linchong Hu      | 26.23                      | Jiangxi  | 5-Jan   | 5-Jan   | 5-Jan   | 1-Feb   | 2-Feb   | 5-Dec   | 5-Dec   | 5-Jan   | 5-Feb   | 5-Feb   | 5-Feb   | 5-Feb   | ND      | ND      | 7-Feb   | 7-Feb   |
| 41  | Qinglan Hu       | 62.07                      | Jiangxi  | 5-Jan   | 5-Jan   | 5-Jan   | 1-Feb   | 2-Feb   | 5-Dec   | 5-Dec   | 5-Jan   | 5-Feb   | 5-Feb   | 5-Feb   | 5-Feb   | ND      | ND      | 7-Feb   | 7-Feb   |
| 42  | Xinmiao Hu       | 35.28                      | Jiangxi  | 5-Jan   | 5-Jan   | 5-Jan   | 1-Feb   | 2-Feb   | 5-Dec   | 5-Dec   | 5-Jan   | 5-Feb   | 5-Feb   | 5-Feb   | 5-Feb   | ND      | ND      | 7-Feb   | 7-Feb   |
| 43  | Xi Hu            | 45.41                      | Jiangxi  | 5-Jan   | 5-Jan   | 5-Jan   | 1-Feb   | 2-Feb   | 5-Dec   | 5-Dec   | 5-Jan   | 5-Feb   | 5-Feb   | 5-Feb   | 5-Feb   | ND      | ND      | 7-Feb   | 7-Feb   |

Note: <sup>1</sup> = WWF 2004 middle-lower Yangtze River floodplain survey;.

<sup>2</sup> = WWF 2005 middle-lower Yangtze River floodplain survey;.

<sup>3</sup> = Shengjin Lake National Nature Reserve survey;.

<sup>4</sup> = Anqing Yanjiang Nature Reserve survey;.

<sup>5</sup> = Poyang Lake National Reserve survey;.

<sup>6</sup> = Dongdongting Lake National Nature Reserve survey;.

<sup>7</sup> = Survey conducted by authors;.

ND = No data available.

**Table S2.** A list of the SR products with the date and row/line numbers corresponding to survey dates.

| Path/Row | 2000/01 | 2001/02  | 2002/03 | 2003/04 | 2004/05  | 2005/06 | 2006/07 | 2007/08  | 2008/09 | 2009/10 | 2010/11 | 2011/12  | 2012/13 | 2013/14 | 2014/15  | 2015/16 |
|----------|---------|----------|---------|---------|----------|---------|---------|----------|---------|---------|---------|----------|---------|---------|----------|---------|
| 121/039  | NS      | NS       | NS      | 2/15/04 | 1/16/05  | 1/11/06 | 1/6/07  | 1/1/08   | 1/11/09 | 1/14/10 | 2/2/11  | 12/11/11 | 3/3/13  | 1/17/14 | 1/4/15   | 2/8/16  |
| 121/040  | 1/29/01 | 1/8/02   | 1/27/03 | 2/15/04 | 12/31/04 | 1/27/06 | 1/6/07  | 1/1/08   | 2/12/09 | 1/14/10 | 12/8/10 | 12/11/11 | NS      | NS      | 2/5/15   | 2/8/16  |
| 122/039  | 1/28/01 | 12/30/01 | 1/10/03 | 2/6/04  | 1/31/05  | NS      | 1/29/07 | 2/9/08   | 2/11/09 | 2/22/10 | 1/24/11 | 12/2/11  | NS      | NS      | 2/12/15  | 2/15/16 |
| 123/040  | NS      | NS       | NS      | 2/13/04 | 1/6/05   | 1/9/06  | 2/5/07  | 12/14/07 | 2/10/09 | 2/21/10 | 1/15/11 | 1/26/12  | 1/28/13 | 1/31/14 | 12/17/14 | 2/6/16  |
